# Supplementary material for: Cerebellar Dysfunction in Adults with Prader Willi Syndrome
Source: MDPI journal article supplement (doi:10.3390/jcm10153320), 2021-07-28
Supplement: s1 [file s1]

**Table S1.** fMRI brain activation during the unimanual flexion-extension task.

|                            | Control Subjects |      | PWS Patients |     |
|----------------------------|------------------|------|--------------|-----|
|                            | MNI<br>x y z     | T    | MNI<br>x y z | T   |
| Right hand                 |                  |      |              |     |
| R Cerebellum               | 12 -54 -22       | 10.7 | 14 -52 -24   | 5.7 |
| L Thalamus                 | -16 -22 2        | 6.8  | -            | -   |
| L Putamen                  | -32 -18 2        | 5.4  | -32 -8 -8    | 4.3 |
| L Sensorimotor Cortex      | -38 -26 50       | 9.5  | -40 -28 58   | 8.9 |
| Left hand                  |                  |      |              |     |
| L Cerebellum               | -12 -56 -18      | 10.0 | -12 -56 -16  | 7.5 |
| R Sensorimotor Cortex      | 26 -16 62        | 9.2  | 38 -22 60    | 8.9 |
| R Supplementary Motor Area | 8 -6 48          | 5.2  | 8 -8 56      | 4.3 |
| R Putamen/Insula           | 38 -22 16        | 4.2  | 48 -16 12    | 5.9 |

x, y, z are coordinates (mm) given in Montreal Neurological Institute (MNI) space. Statistics at corrected threshold  $P_{FWE} < 0.05$  using Monte Carlo simulations. L, left. R, right.

**Table S2.** fMRI brain activation and deactivation during the bimanual anti-phase flexion-extension task.

|                                 | Control Subjects |              | PWS Patients |     |
|---------------------------------|------------------|--------------|--------------|-----|
|                                 | MNI<br>x y z     | T            | MNI<br>x y z | T   |
| Task > Rest                     |                  |              |              |     |
| L Sensorimotor Cortex           | -38 -26 56       | 10.3         | -40 -26 58   | 6.5 |
| R Sensorimotor Cortex           | 36 -24 50        | 9.4          | 40 -22 58    | 8.2 |
| L Premotor Cortex               | -28 -18 72       | 8.5          | -26 -12 58   | 6.8 |
| R Premotor Cortex               | 24 -14 72        | 6.8          | 34 -6 62     | 4.5 |
| L Supplementary Motor Area      | -4 -4 52         | 6.6          | -12 -2 56    | 5.8 |
| R Supplementary Motor Area      | 8 -2 48          | 6.0          | 12 -2 58     | 6.0 |
| R Cerebellum                    | 18 -54 -26       | 9.7          | 22 -52 -30   | 4.3 |
| L Cerebellum                    | -6 -60 -14       | 8.8          | -16 -52 -26  | 4.9 |
| R Thalamus                      | 16 -18 2         | 5.5          | -            | -   |
| L Thalamus                      | -16 -20 4        | 4.5          | -            | -   |
| R Basal Ganglia                 | 24 -8 0          | 7.1          | 30 -12 -4    | 3.9 |
| L Basal Ganglia                 | -28 -8 -4        | 5.7          | -            | -   |
| L Temporo-Occipital Cortex      | -46 -62 2        | 4.6          | -            | -   |
| Task < Rest                     |                  |              |              |     |
| L Occipital Cortex              | -                | -            | -32 -96 10   | 4.3 |
| L Temporal Cortex               | -                | -            | -48 -44 2    | 4.2 |
| PWS Patients < Control Subjects |                  |              |              |     |
|                                 | Cluster size, ml | MNI<br>x y z | T            |     |
| R Cerebellum                    | 3.1              | 14 -58 -22   | 3.9          |     |
| L Temporo-Occipital Cortex      | 2.6              | -46 -62 0    | 3.6          |     |

x, y, z are coordinates (mm) given in Montreal Neurological Institute (MNI) space. Statistics at corrected threshold  $P_{FWE} < 0.05$  using Monte Carlo simulations. L, left. R, right.

**Table S3.** fMRI brain activation and deactivation during the finger-to-thumb opposition task.

|                                 | Control Subjects |            | PWS Patients |     |
|---------------------------------|------------------|------------|--------------|-----|
|                                 | MNI              | T          | MNI          | T   |
|                                 | x y z            |            | x y z        |     |
| Task > Rest                     |                  |            |              |     |
| L Sensorimotor Cortex           | -38 -26 52       | 11.0       | -50 -24 44   | 9.9 |
| L Supplementary Motor Area      | -4 2 48          | 7.3        | -6 0 56      | 7.0 |
| R Supplementary Motor Area      | 8 4 50           | 5.7        | 2 0 64       | 6.5 |
| L Premotor Cortex               | -40 -16 62       | 8.7        | -32 -10 60   | 7.3 |
| R Premotor Cortex               | 32 2 60          | 5.3        | 32 -2 56     | 5.8 |
| L Superior Parietal Cortex      | -40 -42 56       | 6.8        | -30 -46 62   | 8.2 |
| R Superior Parietal Cortex      | 36 -56 62        | 4.5        | 38 -36 46    | 8.6 |
| R Cerebellum                    | 16 -54 -26       | 12.9       | 18 -52 -30   | 7.3 |
| L Cerebellum                    | -32 -64 -32      | 7.7        | -            | -   |
| L Thalamus                      | -14 -20 2        | 7.7        | -14 -20 0    | 5.0 |
| R Basal Ganglia                 | 22 -6 4          | 5.7        | -            |     |
| L Basal Ganglia                 | -20 0 4          | 6.7        | -20 2 2      | 5.6 |
| L Posterior Temporal Cortex     | -52 -38 16       | 7.3        | -            | -   |
| R Anterior Prefrontal Cortex    | 34 42 22         | 4.7        | -            | -   |
| L Anterior Prefrontal Cortex    | -28 52 24        | 3.8        | -            | -   |
| Task < Rest                     |                  |            |              |     |
| R Occipital Cortex              | -                | -          | 24 -64 22    | 4.9 |
| L Precuneus                     | -                | -          | -24 -62 16   | 4.7 |
| PWS Patients < Control Subjects |                  |            |              |     |
|                                 | Cluster size, ml | MNI        | T            |     |
|                                 |                  | x y z      |              |     |
| L Posterior Temporal Cortex     | 2.5              | -50 -40 14 | 4.3          |     |
| R Occipital Cortex              | 31.2             | 38 -78 -12 | 5.8          |     |
| R Cerebellum                    | *                | 28 -70 -18 | 4.0          |     |

x, y, z are coordinates (mm) given in Montreal Neurological Institute (MNI) space. Statistics at corrected threshold  $P_{FWE} < 0.05$  using Monte Carlo simulations. L, left. R, right. \*, same cluster.

**Table S4.** Correlations between activation measurements and behavior scores (group by correlation pattern interactions).

|                                                               | Cluster size,<br>ml | MNI<br>x y z | T   |
|---------------------------------------------------------------|---------------------|--------------|-----|
| Hand grip strength**                                          |                     |              |     |
| PWS pos. corr. > Control pos. corr.<br>Paracentral lobule/SMA | 8.9                 | 6 -10 68     | 4.4 |
| Hand grip strength***                                         |                     |              |     |
| PWS neg. corr > Control neg. corr                             |                     |              |     |
| Cerebellum                                                    | 6.1                 | -4 -20 -24   | 5.2 |
| Thalamus                                                      | 3.9                 | -20 -26 2    | 4.4 |
| Timed up-and-go test**                                        |                     |              |     |
| PWS pos. corr < Control pos. corr                             |                     |              |     |
| Cerebellum                                                    | 2.8                 | 2 -58 -4     | 3.8 |
| Berg Balance Scale*                                           |                     |              |     |
| PWS neg. corr. < Control neg. corr                            |                     |              |     |
| Somatosensory Cortex/ Supramarginal gyrus                     | 5.1                 | 64 -44 38    | 5.0 |
| Supramarginal gyrus                                           | 3.1                 | -50 -44 58   | 3.8 |
| Berg Balance Scale**                                          |                     |              |     |
| PWS pos. corr. < Control pos. corr                            |                     |              |     |
| Premotor Cortex                                               | 2.6                 | -24 6 50     | 4.4 |

\*Unimanual flexion-extension task. \*\*Bimanual anti-phase flexion-extension task. \*\*\*Fingers-to-thumb opposition task. x, y, z are coordinates (mm) given in Montreal Neurological Institute (MNI) space. SMA, Supplementary motor area. Statistics correspond to a corrected threshold  $P_{FWE}<0.05$ .

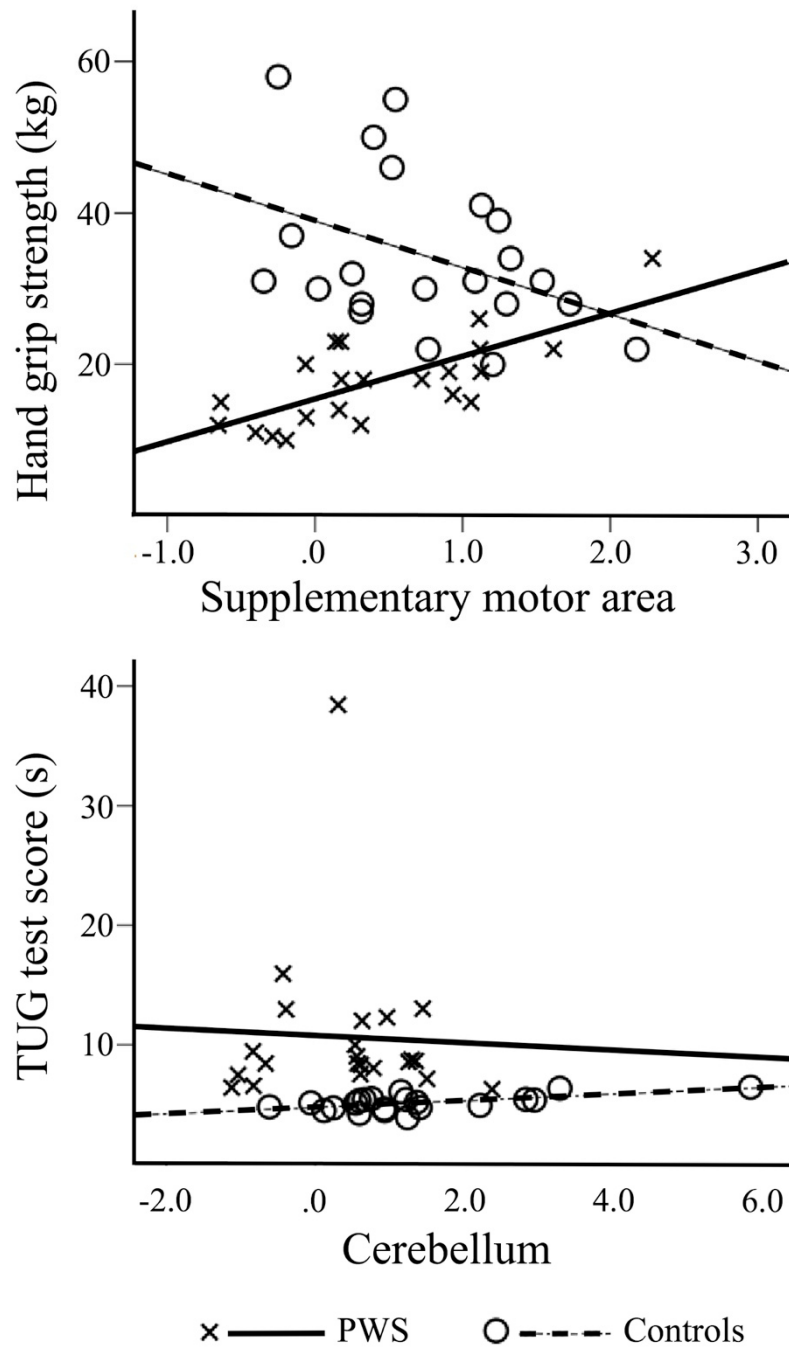

**Figure S1.** Plots of the correlations between activation and behavioral measurements. Top plot, individuals with Prader Willi syndrome (crosses, bold line) showed stronger positive correlation between activation in the supplementary motor area during the bimanual anti-phase flexion-extension task and maximal hand grip strength, as assessed with the JAMAR dynamometer, compared with controls (circles, dashed line) that showed a negative correlation (interaction  $t = 4.4$ ,  $p = 0.0004$  at  $x$ ,  $y$ ,  $z$ : 6 -10 68, displayed on top Figure 4). Bottom plot, individuals with Prader Willi syndrome showed weaker negative correlation between activation in the cerebellum during the bimanual task and total time employed in the TUG test compared with controls that showed a positive correlation (interaction  $t = 2.8$ ,  $p = 0.0002$  at  $x$ ,  $y$ ,  $z$ : 2 -58 -4, displayed on bottom Figure 4). TUG, Timed Up-and Go. PWS, Prader Willi syndrome.
